# Supplementary material for: BLK positively regulates TLR/IL-1R signaling by catalyzing TOLLIP phosphorylation
Source: PubMed Central journal article supplement — J Cell Biol. 2023 Dec 11;223(2):e202302081. doi: 10.1083/jcb.202302081 (PMC10711807; doi:10.1083/jcb.202302081), 2023-12-11

# SourceDataF5

## Figure 5A

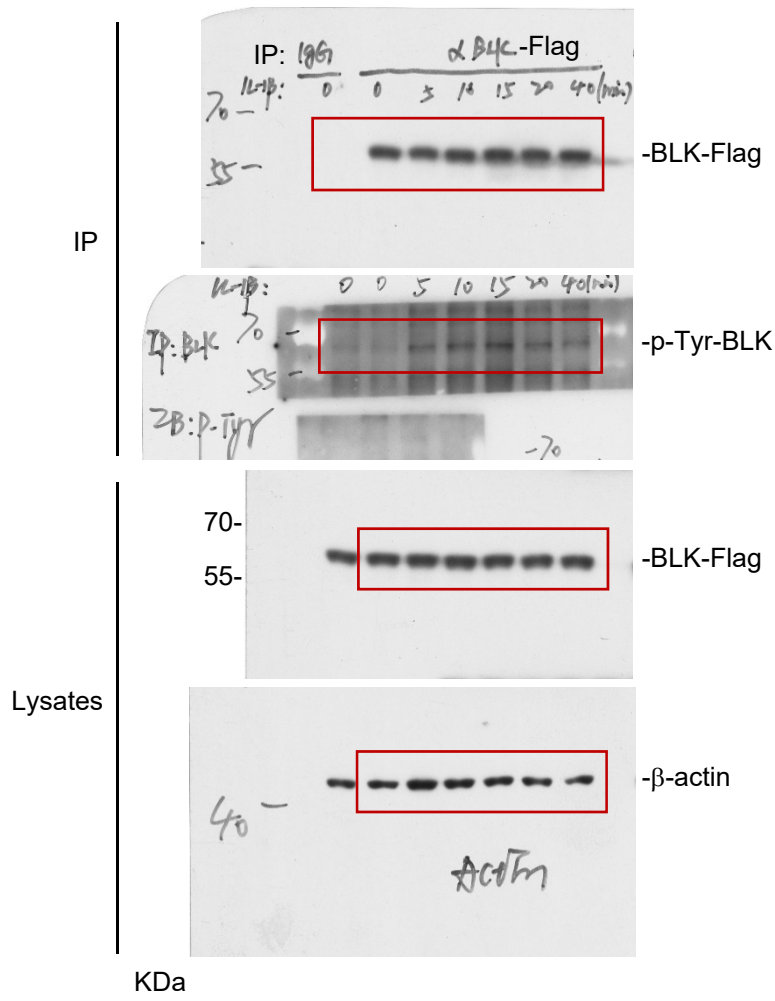

# SourceDataF5

## Figure 5B

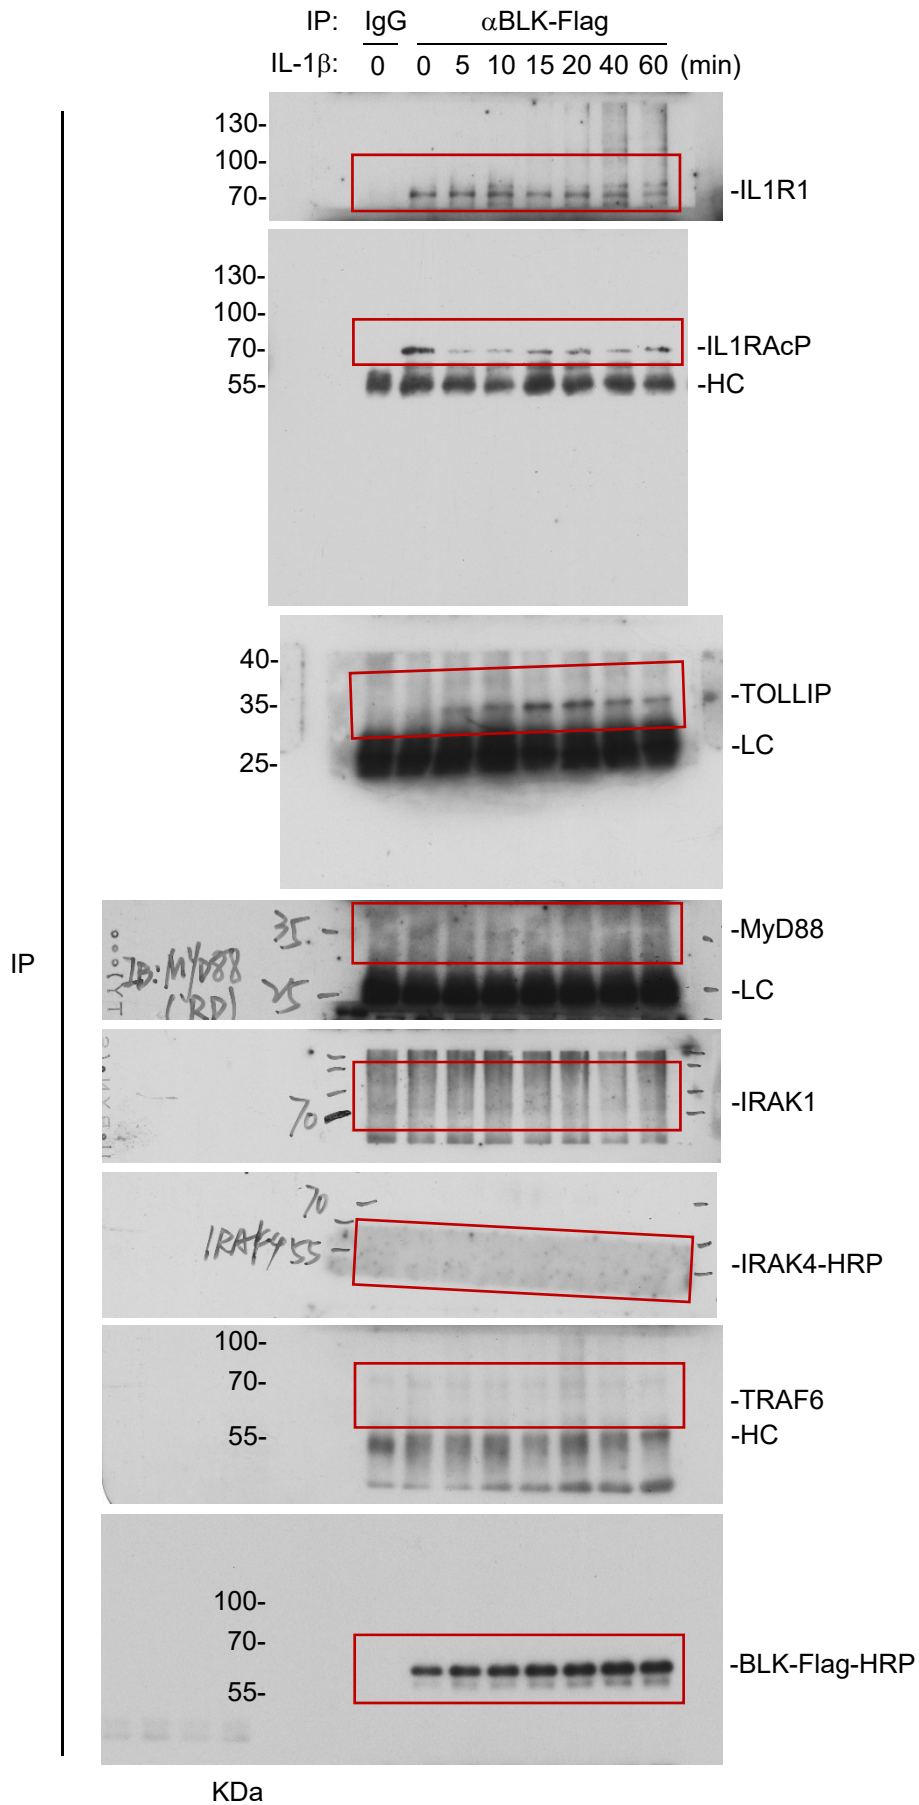

# SourceDataF5

## Figure 5B

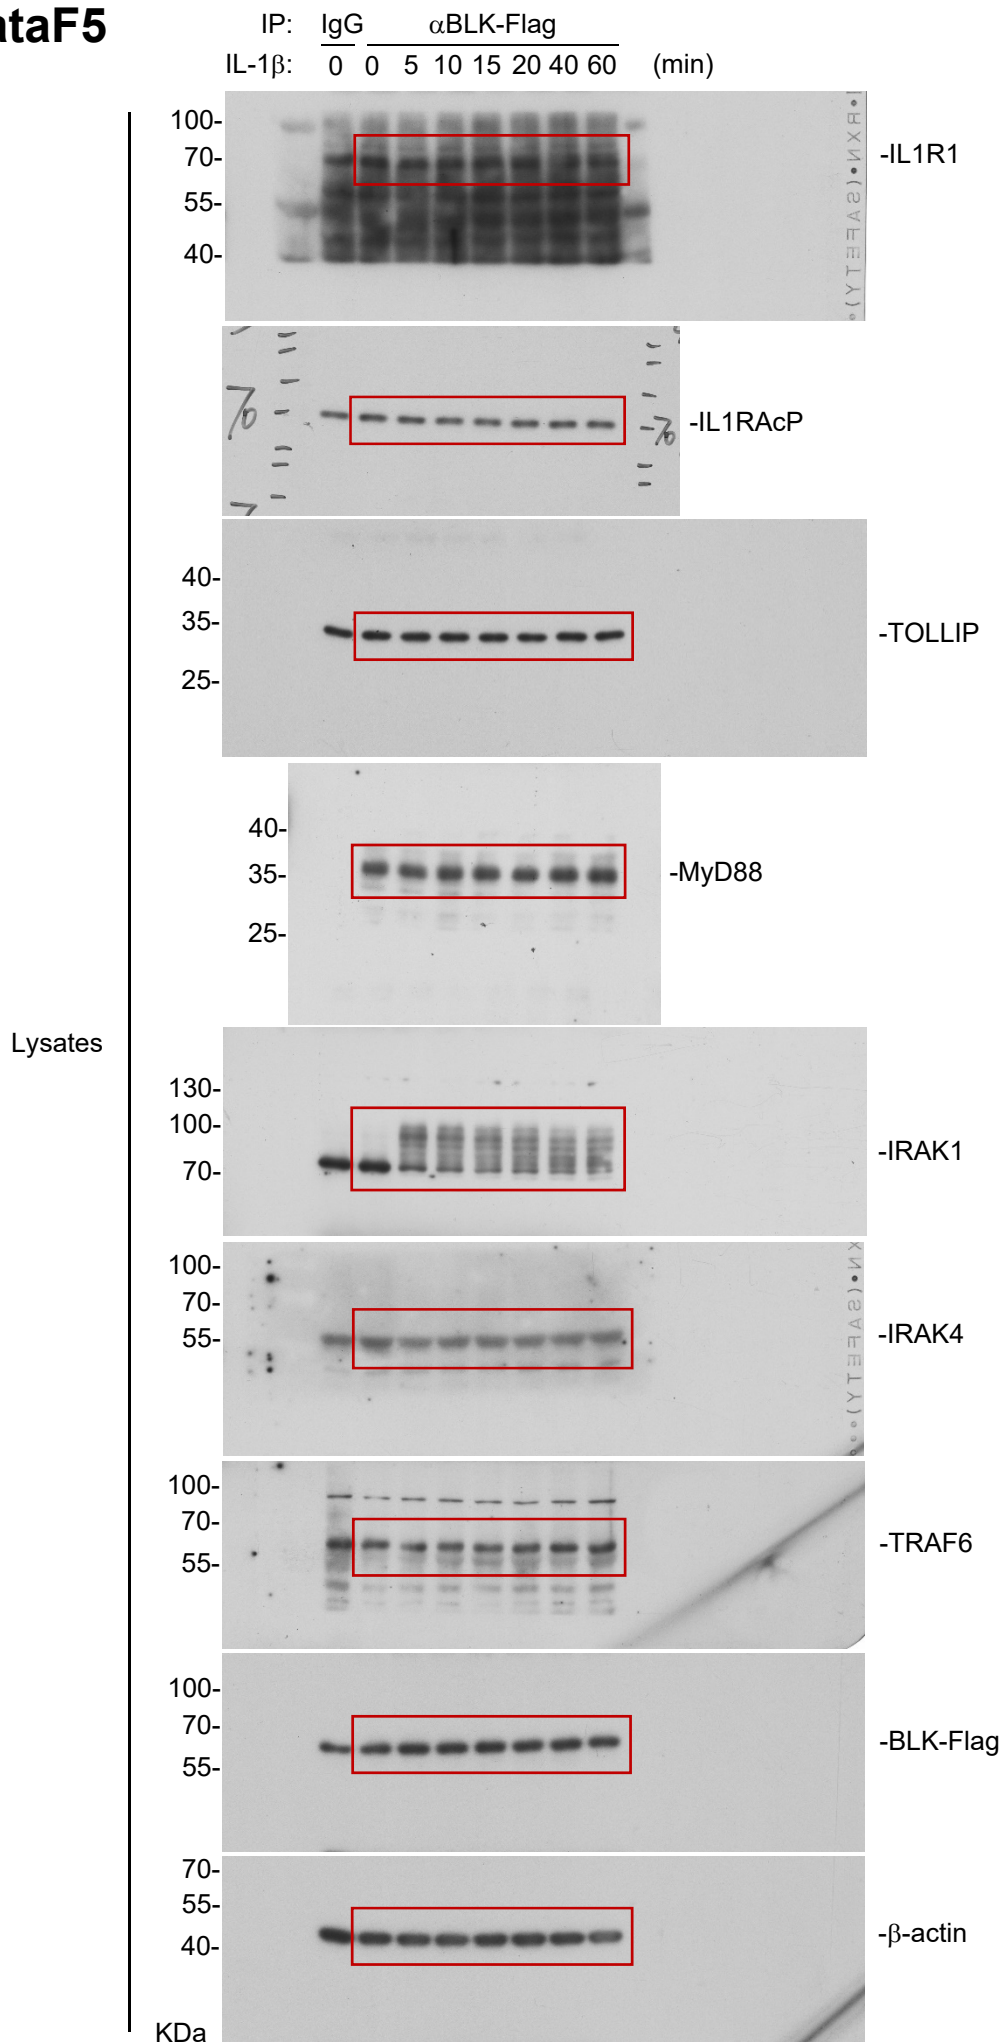

# SourceDataF5

## Figure 5C

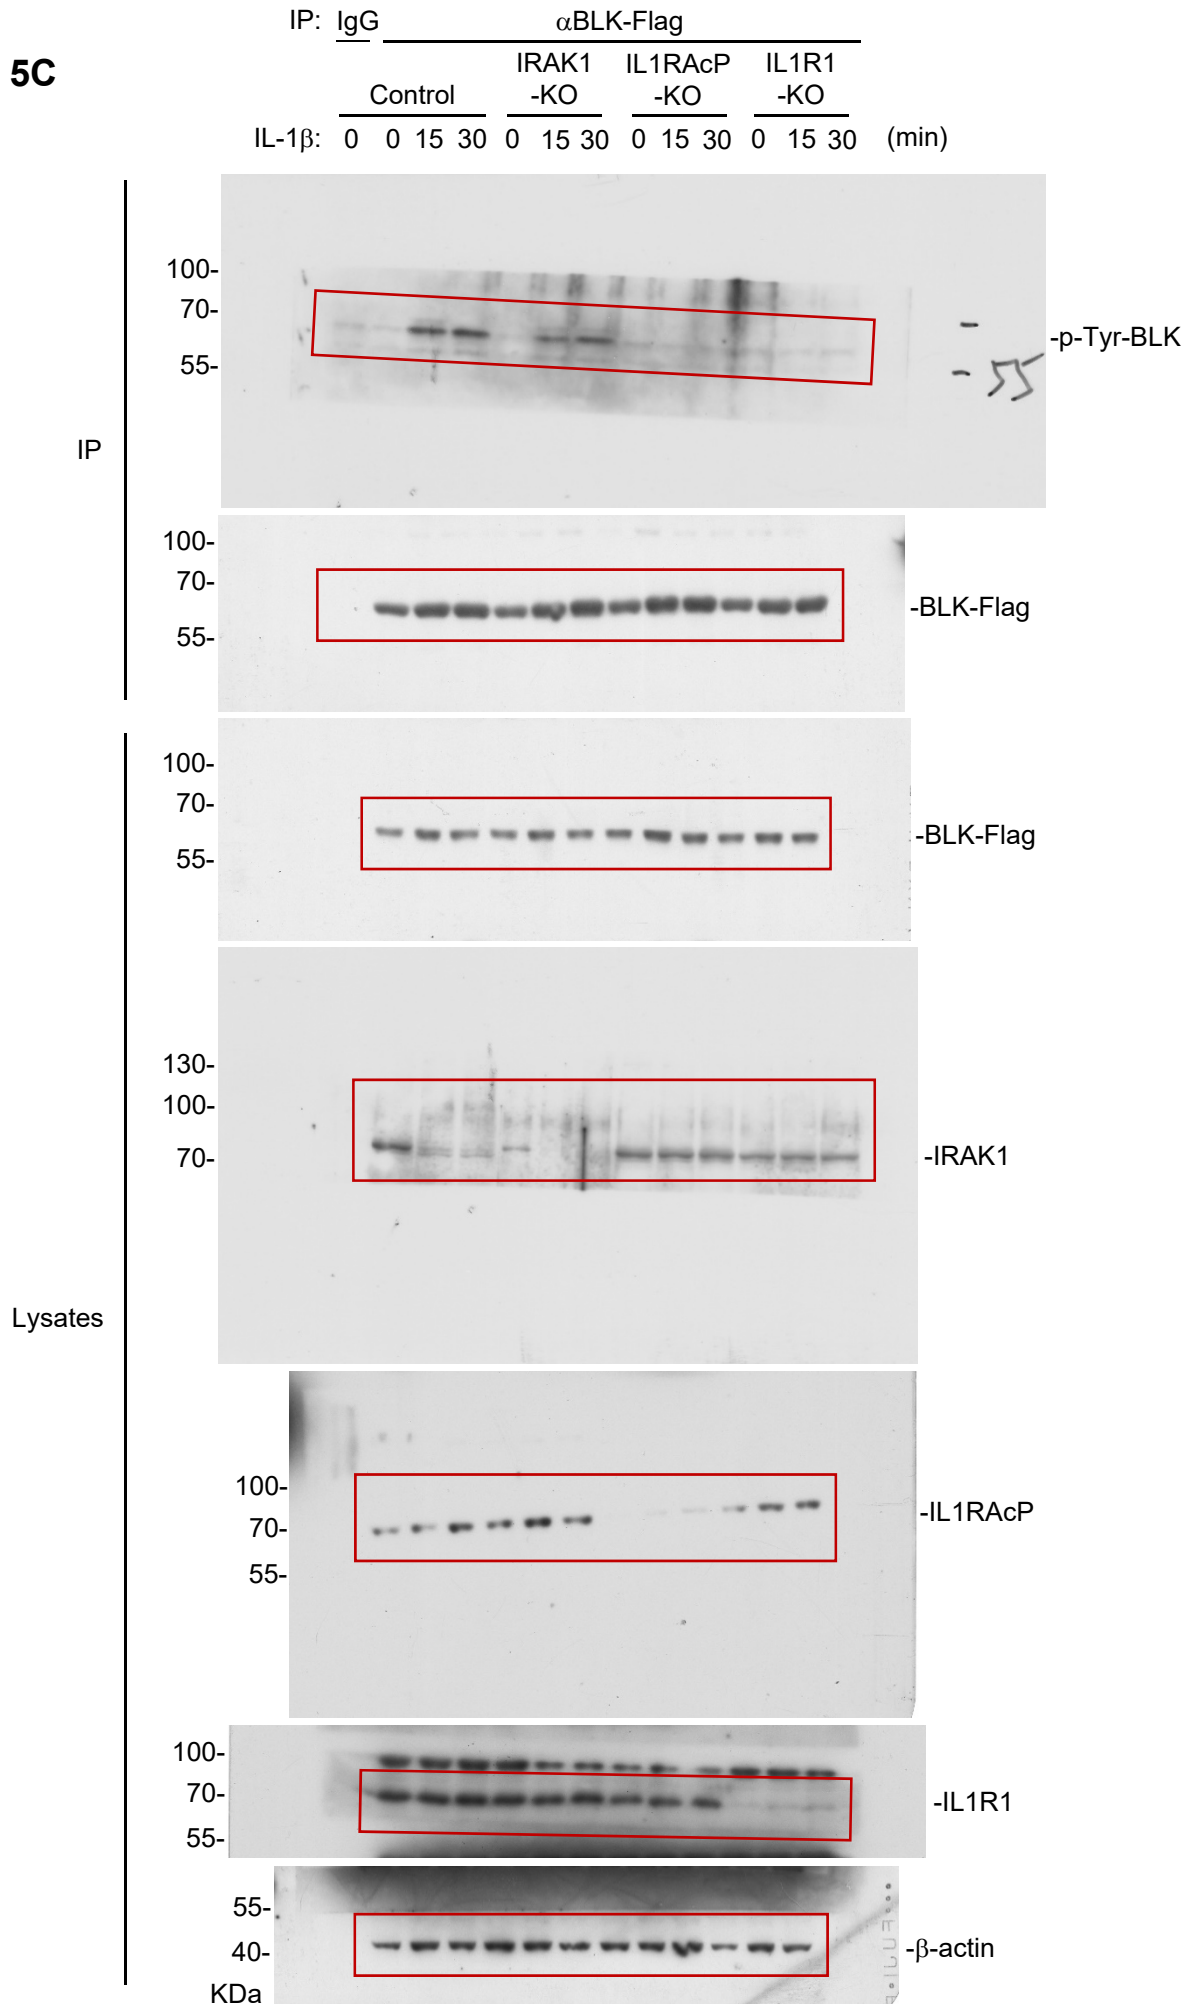

# SourceDataF5

## Figure 5D

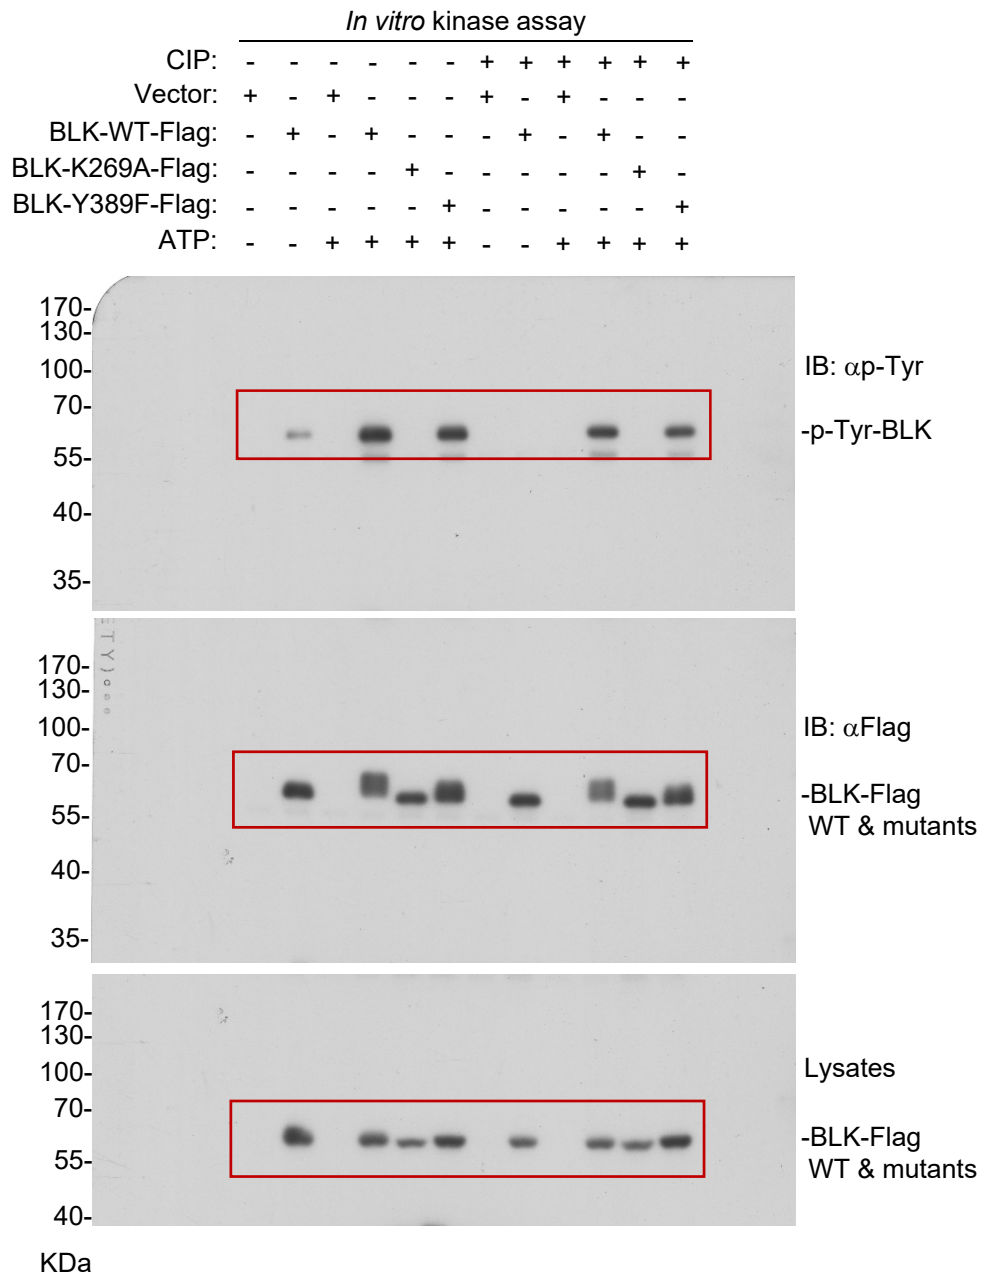

Supplement: JCB_202302081_SourceDataF5.pdf [file JCB_202302081_SourceDataF5.pdf]
