# Supplementary figures and images for: BLK positively regulates TLR/IL-1R signaling by catalyzing TOLLIP phosphorylation
Source: PubMed Central journal article supplement — J Cell Biol. 2023 Dec 11;223(2):e202302081. doi: 10.1083/jcb.202302081 (PMC10711807; doi:10.1083/jcb.202302081), 2023-12-11

# SourceDataF1

Figure 1I

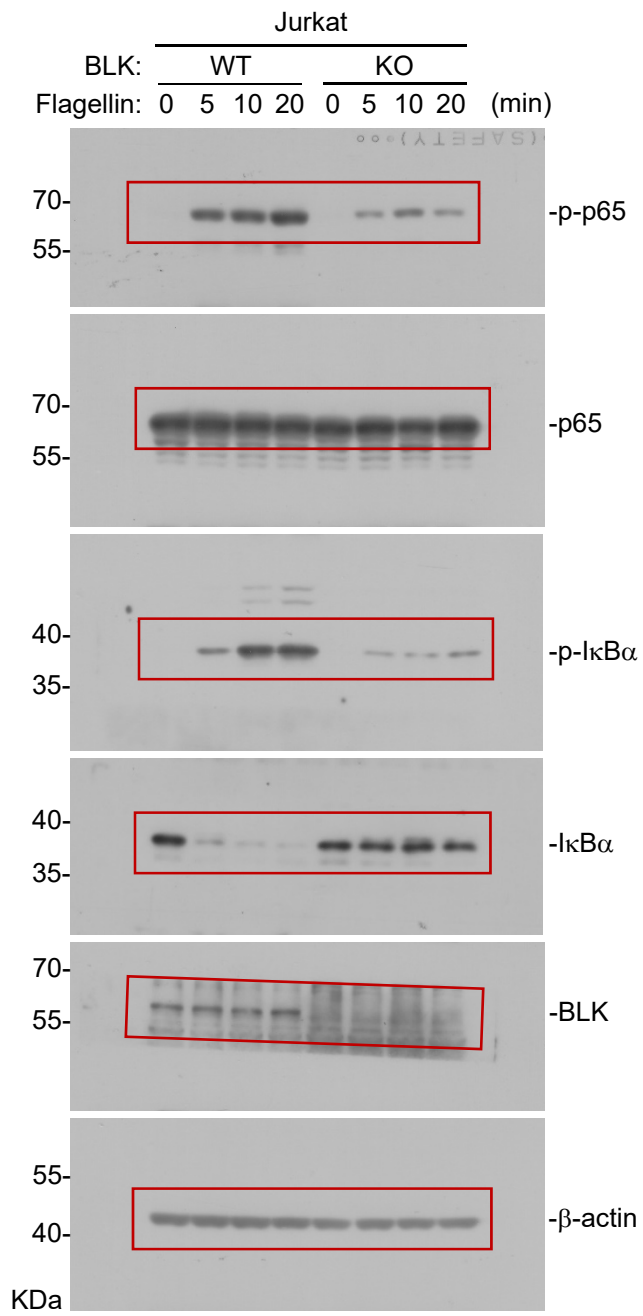

# SourceDataF1

## Figure 1J

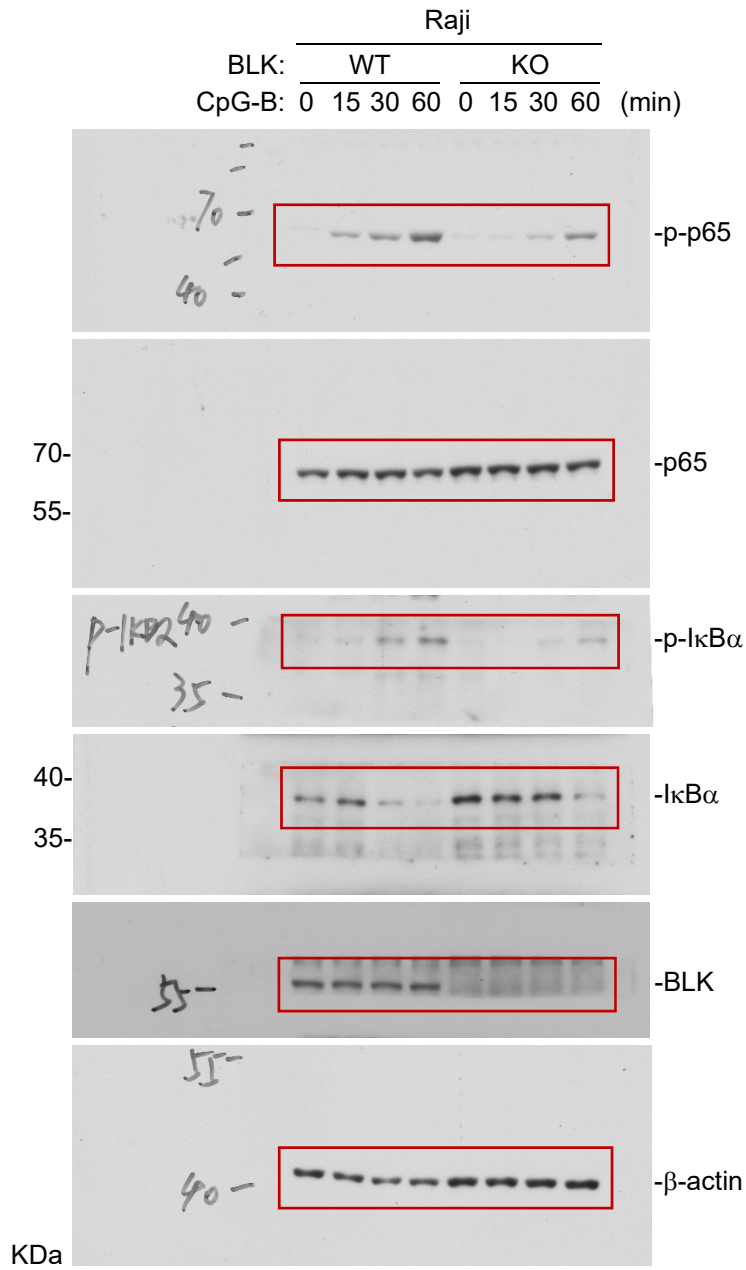

# SourceDataF1

## Figure 1K

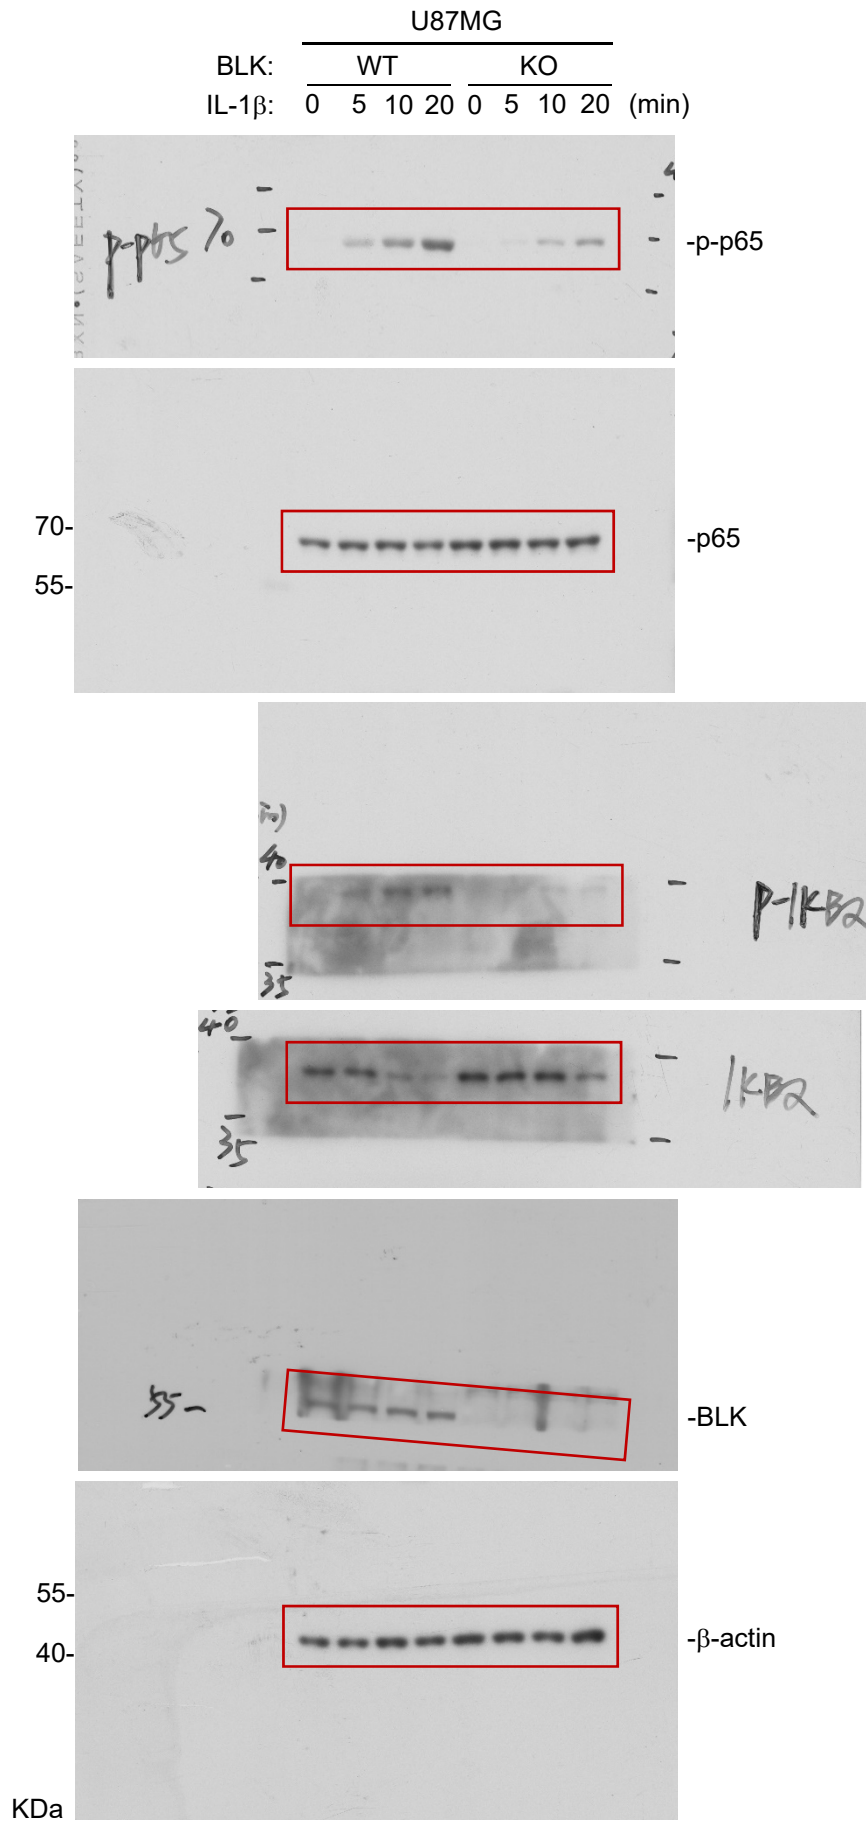

Supplement: JCB_202302081_SourceDataF1.pdf [file JCB_202302081_SourceDataF1.pdf]
